# Supplementary material for: A reductant-resistant ratiometric, colorimetric and far-red fluorescent probe for rapid and ultrasensitive detection of nitroxyl
Source: Royal Society of Chemistry journal article supplement (doi:10.1039/c6tb03359h), 2017-01-01
Supplement: c6tb03359h1.pdf [file c6tb03359h1.pdf]

## Supporting Information

### **A reductant-resistant ratiometric, colorimetric and far-red fluorescent probe for rapid and ultrasensitive detection of nitroxyl**

Caiyun Liu,<sup>a,b,‡</sup> Yawei Wang,<sup>b,‡</sup> Chengcheng Tang,<sup>b</sup> Fang Liu,<sup>b</sup> Zhenmin Ma,<sup>b</sup> Qiang Zhao,<sup>b</sup>  
Zhongpeng Wang,<sup>b</sup> Baocun Zhu<sup>b,\*</sup> and Xiaoling Zhang<sup>a,\*</sup>

<sup>a</sup> *Key Laboratory of Cluster Science of Ministry of Education, School of Chemistry, Beijing Institute of Technology, Beijing 100081, China*

<sup>b</sup> *School of Resources and Environment, University of Jinan, Shandong Provincial Engineering Technology Research Center for Ecological Carbon Sink and Capture Utilization, Jinan 250022, China*

<sup>\*</sup>*Corresponding author. Fax: +86-10-88875298; Tel.: +86-10-88875298*

*E-mail address: lcyzbc@163.com (B. Zhu); zhangxl@bit.edu.cn*

<sup>‡</sup> These authors contributed equally to the present work.

## **Contents**

**1. Synthesis of reference compound R-TCF**

**2. The effects of pH on the fluorescence intensity of probe HNO-TCF**

**3. The fluorescence spectrometry of reference compound R-TCF**

**4. <sup>1</sup>H-NMR, <sup>13</sup>C-NMR and HRMS spectra of probe HNO-TCF**

## 24 1. Synthesis of reference compound R-TCF

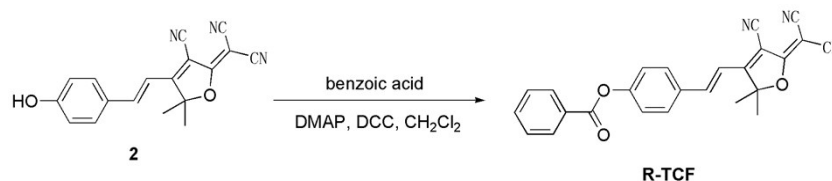

26 **Scheme S1** The synthesis of **R-TCF**

27 A mixture of 1-(3-cyano-2-dicyanomethylen-5,5-dimethyl-2,5-dihydrofuran-4-yl)-2-  
28 (4-hydroxyphenyl) ethane (compound **2**, 303 mg, 1 mmol), benzoic acid (366 mg, 3 mmol),  
29 4-dimethylaminopyridine (DMAP, 244 mg, 2 mmol) and dicyclohexylcarbodiimide (DCC,  
30 826 mg, 4 mmol) in CH<sub>2</sub>Cl<sub>2</sub> (30 mL) was stirred at 45 °C for 8 hours. After cooled to room  
31 temperature, the reaction mixture was purified by silica column chromatography (CH<sub>2</sub>Cl<sub>2</sub> as  
32 eluent) in order to get pure reference compound **R-TCF**. <sup>1</sup>H-NMR (400 MHz, DMSO-*d*<sub>6</sub>) δ  
33 (\*10<sup>-6</sup>): 1.82(s, 6H), 7.27(d, *J* = 16 Hz, 1H), 7.49(d, *J* = 8 Hz, 2H), 7.64(t, *J* = 8 Hz,  
34 2H), 7.79(t, *J* = 8 Hz, 1H), 7.97(d, *J* = 20 Hz, 1H), 8.06(d, *J* = 8 Hz, 2H), 8.17(d, *J* =  
35 8 Hz, 2H). <sup>13</sup>C-NMR (100 MHz, DMSO-*d*<sub>6</sub>) δ (\*10<sup>-6</sup>): 25.55, 54.93, 99.98, 100.18, 111.29,  
36 112.30, 113.14, 116.06, 123.40, 129.08, 129.52, 130.38, 131.37, 132.74, 134.76, 146.67,  
37 153.90, 164.75, 175.55, 177.60. ESI-MS (positive) calcd for C<sub>25</sub>H<sub>17</sub>N<sub>3</sub>O<sub>3</sub>Na [M+Na]<sup>+</sup> 430.1,  
38 found 430.1.

## 39 2. The effects of pH on the fluorescence intensity of probe HNO-TCF

40 The pH effects on the fluorescence intensity of probe **HNO-TCF** and compound **2** (5  
41 μM) in a mixture of ethanol and water (5:5, v/v) solution containing 5 mM PBS were  
42 examined.

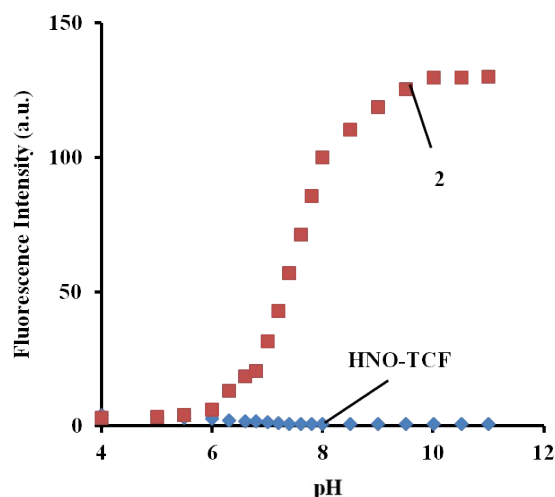

43  
 44 **Fig. S1** The effects of pH on the fluorescence intensity of probe **HNO-TCF** and compound **2** ( $5\ \mu\text{M}$ ) a  
 45 mixture of ethanol and water (5:5, v/v) solution containing 5 mM PBS. All data represent the fluorescence  
 46 intensity at 614 nm. Excitation wavelength = 560 nm, excitation and emission slit widths = 10 nm and 10  
 47 nm.

### 48 3. The fluorescence spectrometry of reference compound R-TCF

49 To eliminate concerns about the effect of the **HNO-TCF** oxide on the fluorescence  
 50 detection, the fluorescence spectrometry of **R-TCF** ( $5\ \mu\text{M}$ ) have been investigated. As shown  
 51 in Fig. S2, Only negligible fluorescence of **R-TCF**, similar to the fluorescence of **HNO-TCF**,  
 52 was observed, which is probable due to the inhibition of effective internal charge transfer  
 53 (ICT) resulted from the protection of hydroxyl (*J. Am. Chem. Soc.*, 2012, 134, 13510).

54 To understand the mechanism of **HNO-TCF** in sensing HNO, the reference experiment  
 55 about the effect of HNO on the fluorescence spectrometry of **R-TCF** ( $5\ \mu\text{M}$ ) was also carried  
 56 out. The result exhibited that addition of AS ( $100\ \mu\text{M}$ ) did not result in the distinguishable  
 57 fluorescence enhancement of **R-TCF**, implying that the reaction of **HNO-TCF** with HNO  
 58 was attributed to the 2-(diphenylphosphino)benzoate recognition moiety.

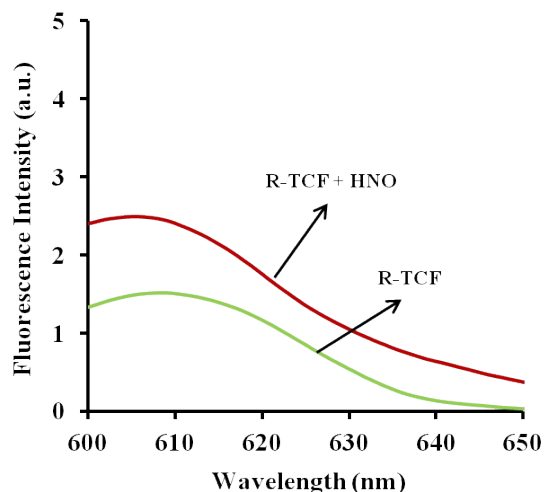

59

60 **Fig. S2** The fluorescence spectra of **R-TCF** (5  $\mu$ M) in the absence and presence of **AS** (100  $\mu$ M) in a  
 61 mixture of ethanol and water (5:5, v/v) solution containing 5 mM PBS (pH 7.4) at 25  $^{\circ}$ C. Excitation  
 62 wavelength = 560 nm, excitation and emission slit widths = 10 nm and 10 nm.

#### 63 4. $^1\text{H}$ -NMR, $^{13}\text{C}$ -NMR and HRMS spectra of probe HNO-TCF

##### 64 $^1\text{H}$ -NMR probe HNO-TCF

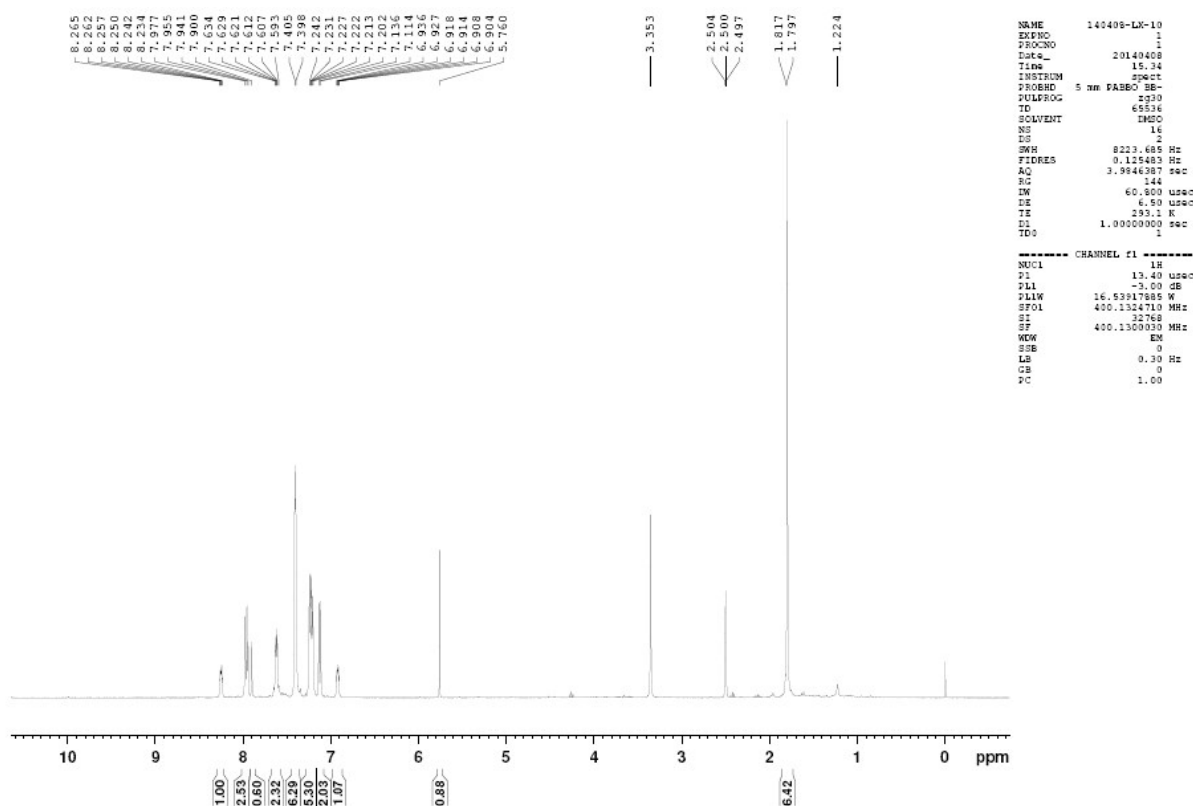

65

66

67
